# **A Powerful Approach for Identification of Differentially Transcribed mRNA Isoforms**

Yuan-De Tan and Joel R. Neilson

Department of Molecular Physiology and Biophysics and Dan L. Duncan Cancer Center,  
Baylor College of Medicine, Houston, Texas, 77030

21 Next generation sequencing is being increasingly used for transcriptome-wide  
22 analysis of differential gene expression. The primary goal in profiling expression is  
23 to identify genes or RNA isoforms differentially expressed between specific  
24 conditions. Yet, the next generation sequence-based count data are essentially  
25 different from the microarray data that are continuous type, therefore, the  
26 statistical methods developed well over the last decades cannot be applicable. For  
27 this reason, a variety of new statistical methods based on count data of transcript  
28 reads has been correspondingly developed. But currently the transcriptomic count  
29 data coming only from a few replicate libraries have high technical noise and small  
30 sample size bias, performances of these new methods are not desirable. We here  
31 developed a new statistical method specifically applicable to small sample count  
32 data called mBeta t-test for identifying differentially expressed gene or isoforms on  
33 the basis of the Beta t-test. The results obtained from simulated and real data  
34 showed that the mBeta t-test method significantly outperformed the existing  
35 statistical methods in all given scenarios. Findings of our method were validated by  
36 qRT-PCR experiments. The mBeta t-test method significantly reduced true false  
37 discoveries in differentially expressed genes or isoforms so that it had high work  
38 efficiencies in all given scenarios. In addition, the mBeta t-test method showed high  
39 stability in performance of statistical analysis and in estimation of FDR. These  
40 strongly suggests that our mBeta t-test method would offer us a creditable and  
41 reliable result of statistical analysis in practice.

42

43

44 Development of high-throughput sequencing technologies in recent years (Cloonan et al.  
45 2008a; Cloonan et al. 2008b; Mortazavi et al. 2008) has massively been increasing genomic  
46 data and led sequencing cost to rapidly go down so that the sequencing technologies as  
47 platforms for studying gene expression or sub-gene expression have become more and  
48 more attractive (McCarthy et al. 2012). Current next generation sequencing (NGS)  
49 technologies such as RNA-seq (Cloonan et al. 2008a; Cloonan et al. 2008b; Mortazavi et al.  
50 2008), Tag-seq (Morrissey et al. 2009), deepSAGE (t Hoen et al. 2008), SAGE-seq (Wu et al.  
51 2010), and PAS-seq (Shepard et al. 2011) can generate short reads of sequence tags, that is,  
52 sequences of 35-300 bp that correspond to fragments of the original RNA. In particular, 3P-  
53 seq or PAS-seq (Shepard et al. 2011), a deep sequencing-based method for quantitative and  
54 global analysis of RNA polyadenylation has been used to study expression behavior of RNA  
55 isoforms in a variety of human and mouse cells.

56

57 To evaluate differential expression between conditions or cases, sequences need to be  
58 mapped to genome and annotated. After doing so, the sequence data can be transformed to  
59 count data at genomic level of interest. Although RNA-Seq can be used to study differential  
60 transcription of novel exons, splice-variants and isoforms-specific (Denoeud et al. 2008; Li  
61 et al. 2010; Pan et al. 2008; Wang et al. 2009) and allele-specific expression (Degner et al.  
62 2009; Montgomery et al. 2010), our focus here is on differential expression of genes or  
63 isoforms due to alternative polyadenylation signals and cleavage sites in 3' untranslated  
64 regions (3'UTR).

65

66 A RNA sample may be thought of as a RNA population and each RNA sequence as one  
67 individual. Sequencing a RNA sequence is a random process of sampling from a RNA  
68 population. If each individual RNA has equal chance to be selected for sequencing, then  
69 probability of sequencing a RNA sequence is proportional to the length of waiting time  
70 (Anders et al. 2010). Thus number of RNA read counts for a given genomic feature should  
71 follow Poisson distribution. The Poisson distribution implicates that only one parameter  
72 determines count variation of reads. However, since the Poisson model is just with respect  
73 to noise but does not deal with biological source of variation, that is, difference in  
74 transcription between samples, some counts are over-dispersed between samples under  
75 the Poisson Model. Accordingly, variation of read counts consists of two parts:  
76 noise(Poisson) and biological variability, that is,  $\sigma^2 = \sigma_{\text{noise}}^2 + \sigma_{\text{biological}}^2 = \mu + a\mu^2$  where  
77  $\sigma_{\text{noise}}^2 = \mu$  is variance of Poisson distribution and  $\sigma_{\text{biological}}^2$  is biological variance, which is  
78 determined by biological effect  $a$ . This is just characteristic of negative binomial  
79 distribution (Anders et al. 2010; Robinson et al. 2008).

80

81 To identify differential transcription of RNA tags, many statistical methods have been  
82 proposed so far. At early stage, most of methods are based on Poisson distribution  
83 (Madden et al. 1997) or normal approximations (Kal et al. 1999; Man et al. 2000; Michiels  
84 et al. 1999), permutation (Zhang et al. 1997), beta distribution (Baggerly et al. 2003) or  
85 over-dispersed logistic linear distribution (Baggerly et al. 2004). As RNA count data have  
86 become more and more prevalent, newer statistical methods such as Exact test(Robinson

87 et al. 2008), empirical Bayesian method (Hardcastle et al. 2010), DESeq (Anders et al.  
88 2010), generalized linear modeling (McCarthy et al. 2012), and likelihood ratio tests (Wang  
89 et al. 2010) have recently been developed.

90

91 Despite the development of technologies decreasing costs of sequencing, RNA-Seq  
92 experiments still remain expensive for many researchers so that RNA-Seq studies have to  
93 be limited to only a very small number of replicate libraries for each condition or case. The  
94 basic scientific need to assess differential transcription due to biological variation remains  
95 undiminished but the problem becomes complicated by the fact that different genes or  
96 transcripts may have different degrees of biological variation. There is therefore a need to  
97 estimate biological variation as reliably as possible from a few replicate libraries (McCarthy  
98 et al. 2012). The classical statistical methods are not applicable for such data. To address  
99 this problem, many methods such as empirical Bayesian method (baySeq) (Hardcastle et al.  
100 2010), DESeq (Anders et al. 2010) and Exact test (Robinson et al. 2010b; Robinson et al.  
101 2007; Robinson et al. 2008) adopt variation information across transcriptome and the  
102 GLM (McCarthy et al. 2012) uses similarity information between genes. However, none of  
103 these methods considers fudge effect of small sample size. So-called fudge effect is such an  
104 effect on which differences between two means are small but sample variances are also  
105 much smaller such that statistics are inflated (Tusher et al. 2001, Tan et al 2007). This is  
106 because sample size is so small that there is a big chance to give rise to small difference  
107 among replicates in a large-scale data (see Discussion Section for more detail). The fudge  
108 phenomenon broadly exists in high-throughput data, especially, in transcriptomic data

109 because there are a lot of very small counts. Therefore, to suppress such an effect can  
110 greatly improve performance of the statistical methods in identification of differentially  
111 expressed genes or isoforms. For doing so, we are required to develop novel methods or to  
112 modify the existing statistical methods.

113

114 Our development work is based on Beta t-test of Baggerly et al (2003) (Baggerly et al.  
115 2003) because this method is not sensitive to data distributions (see Discussion Section).  
116 On the other hand, the Beta t-test approach optimizes weights for replicate libraries. The  
117 weighting and optimal strategy may be useful for excluding artificial or technical noise in  
118 count data and hence the genes or isoforms with better consistent counts in replicates  
119 libraries but having differential transcriptions between conditions would be identified with  
120 higher probabilities. The third, a very important point, is that it is t-test, a classical  
121 distance-variance test approach, that is clear and simple to understand gene differential  
122 expression but its fudge effect is also significant. For this reason, we are highly motivated to  
123 develop a novel beta t-statistic by which gene mRNAs to be tested can be separated into  
124 two different groups with least type I and type II errors.

125

126

## Results

### 127 **Statistical Methods**

128 Here we follow the notations of Baggerly et al (Baggerly et al. 2003) but for the  
129 convenience of description, we use isoforms as features of study. However, our method is

130 available to all types of count data. Let  $X_i$  be count for an isoform of interest in library  $i$ .  
 131 Let  $p_i$  be true proportion of an isoform and  $N_i$  be total count in library  $i$ , that is, size of  
 132 library  $i$ . We suppose that the proportion  $p_i$  of a count in library  $i$  follows a beta  
 133 distribution,

$$134 \quad p_i \sim \text{Beta}(\alpha, \beta), \quad (1)$$

135 but as mentioned above, the count for an isoform has binomial or negative binomial  
 136 distribution. In our current study, we consider the binomial distribution instead of negative  
 137 binomial distribution (see Discussion Section). Since  $\hat{p}_i = X_i / N_i$  is an estimate of  $p_i$ , the  
 138 mean and variance of the estimated proportion for this isoform in library  $i$  are given by  $\alpha$ ,  
 139  $\beta$  and  $N_i$  (see Supplemental Appendix A).

140

141 Considering the case of small sample size, we use weight to correct biases of expectation  
 142 and variance of estimated proportion  $p$ . Supposing that we have  $m$  replicate libraries in a  
 143 condition, the mean and variance of proportions in  $m$  replicate libraries can be linearly  
 144 combined by weights (Baggerly et al. 2003):

$$145 \quad E\left(\sum_{i=1}^m w_i \hat{p}_i\right) = \sum_{i=1}^m w_i E(\hat{p}_i) = \frac{\alpha}{\alpha + \beta} \sum_{i=1}^m w_i = \frac{\alpha}{\alpha + \beta} \quad (2a)$$

$$146 \quad V\left(\sum_{i=1}^m w_i \hat{p}_i\right) = \sum_{i=1}^m w_i^2 V(\hat{p}_i) = \frac{w_i^2 \alpha \beta}{(\alpha + \beta)(\alpha + \beta + 1)} \left[ \frac{1}{\alpha + \beta} + \frac{1}{N_i} \right] \quad (2b)$$

147 where the sum of weights over  $m$  replicates is constrained to be 1 . Equation (2a) indicates  
 148 that this combination has the correct mean. Using a partial derivative of variance of  
 149 weighted proportions with respect to weights, solution for weight vectors can be  
 150 analytically given by

$$151 \quad w_i \propto \left[ \frac{1}{\alpha + \beta} + \frac{1}{N_i} \right]^{-1} . \quad (3)$$

152 Equation (3) indicates that the weights are determined by the means and sizes of libraries.  
 153 Here two extreme cases may occur: If  $\alpha + \beta \rightarrow \infty$ , then weight  $w_i$  is proportional to size of  
 154 library  $i$ ,  $N_i$ , meaning that distribution of  $p_i$  is degenerate so that there is no change in the  
 155 true proportion going from sample to sample. If, on the other hand,  $\alpha + \beta$  is very small,  
 156 then the weights would be roughly the same for all libraries. The true optimum lies  
 157 somewhat in between. With the weights, the proportion for an isoform count in a condition  
 158 is now estimated by

$$159 \quad \hat{p} = \sum_{i=1}^m w_i \hat{p}_i \quad (4)$$

160 and its variance is also estimated, in an unbiased fashion, by

$$161 \quad \hat{V}^* = \frac{\sum_{i=1}^m (w_i \hat{p}_i)^2 - (\sum_{i=1}^m w_i^2) \hat{p}^2}{1 - (\sum_{i=1}^m w_i^2)} . \quad (5)$$

162 Since we have weights for all parameters ( $\alpha$ ,  $\beta$ ,  $p$ , and  $V$ ) in a condition, then an iterative  
 163 search algorithm for optimal estimation of these parameters can be driven by weights (see  
 164 Supplemental Appendix B).



165

166 Despite the estimation of variances of proportions in a condition is unbiased and  
 167 optimized, those isoforms of extremely small counts would have very small and similar  
 168 proportions in a few replicate libraries, which leads variances to be much smaller than  
 169 differences between means so that the t-values are inflated (see Discussion Section). To  
 170 avoid occurrence of this phenomenon, a modified estimator of variance is found to be

$$171 \quad \hat{V} = \max[\hat{V}^*, \hat{V}^\#] . \quad (6)$$

172 In Baggerly et al(Baggerly et al. 2003),  $\hat{V}^\#$  is given by

$$173 \quad \hat{V}^\# = \frac{\sum_{i=1}^m X_i \left( 1 - \frac{\sum_{i=1}^m X_i}{\sum_{i=1}^m N_i} \right)}{\sum_{i=1}^m N_i} . \quad (7a)$$

174 From Equation(7a), we can find that when  $\sum_{i=1}^m X_i = 0$ , then  $\hat{V}^\# = 0$ . In addition,  $\frac{\sum_{i=1}^m X_i}{(\sum_{i=1}^m N_i)^2}$

175 allows  $\hat{V}^\#$  to be extremely small. In order to avoid the extreme small variance, we modify

176  $\hat{V}^\#$  as

$$177 \quad \hat{V}^\# = \frac{\frac{1 + \sum_{i=1}^m X_i}{m \sum_{i=1}^m N_i} \left( 1 - \frac{1 + \sum_{i=1}^m X_i}{m \sum_{i=1}^m N_i} \right)}{\frac{1}{m} \sum_{i=1}^m N_i} \quad (7b)$$

178  $\hat{V}^\#$  in Equation (7b) is larger than that in Equation(7a). Equation (7b) shows that (1) lower  
 179 bound of  $\hat{V}^\#$  is  $\frac{m^2}{(\sum_{i=1}^m N_i)^2} \left(1 - \frac{m}{\sum_{i=1}^m N_i}\right)$ , not zero and (2)  $\hat{V}^\# > \hat{V}^*$  when  $\sum_{i=1}^m X_i$  is extremely  
 180 small. Thus  $\hat{V} = \hat{V}^\#$  in case of extremely small  $\hat{V}^*$ .

181

182 By the above optimal estimation, we obtain  $\hat{p}_A$  and  $\hat{p}_B$ ,  $\hat{V}_A$  and  $\hat{V}_B$  in conditions A and B,  
 183 respectively. Using these estimates, the t-statistic similar to Z statistic suggested by Kar et  
 184 al (Kal et al. 1999) is found to be

$$185 \quad t = \frac{\hat{p}_A - \hat{p}_B}{\sqrt{\hat{V}_A + \hat{V}_B}} \quad (8)$$

186 with degrees of freedom

$$187 \quad df = \frac{(\hat{V}_A + \hat{V}_B)^2}{\frac{\hat{V}_A^2}{N_A - 1} + \frac{\hat{V}_B^2}{N_B - 1}} \quad (9)$$

188 (Baggerly et al. 2003) where  $N_A = \sum_{i=1}^{m_A} N_{Ai}$  and  $N_B = \sum_{i=1}^{m_B} N_{Bi}$ . With  $df$ , we can obtain p-  
 189 value for each t-statistic from the t-distribution. For count-based transcriptional data,  
 190 however, since replicate numbers are very small (for example, 3 replicate libraries), a  
 191 potential for “fudge” effect exists in a population. Although Equation (6) inserts another  
 192 estimator of variance as a lower bound so as to avoid occurrence of zero or extremely small  
 193 variance, the fudge effect still exists in Equation (8) due to small sample size. To remove  
 194 this effect, the t-statistic is modified as

195 
$$t^* = \frac{\rho}{\omega} \frac{\hat{p}_A - \hat{p}_B}{\sqrt{\hat{V}_A + \hat{V}_B}}. \quad (10)$$

196 Here  $\rho$  is defined as  $\rho = \sqrt{\phi\psi}$  where  $\psi$  is referred to as “polar ratio” (see Appendix C1).  
 197 Equation (C1) indicates that if two data sets  $X_A = \{X_{A1}, \dots, X_{Am_A}\}$  and  $X_B = \{X_{B1}, \dots, X_{Bm_B}\}$   
 198 for an isoform do not overlap, then  $\psi > 1$ , otherwise,  $\psi \leq 1$ . In statistical theory, two count  
 199 sets that are definitely separated have a higher probability of showing that they come from  
 200 two different populations than those that are overlap.  $\zeta$  is referred to as log odds ratio (see  
 201 Supplemental Appendix C2). If two data sets  $X_A = \{X_{A1}, \dots, X_{Am_A}\}$  and  $X_B = \{X_{B1}, \dots, X_{Bm_B}\}$   
 202 do not overlap and have a big gap, then  $\bar{X}_A < \bar{X} < \bar{X}_B$  or  $\bar{X}_A > \bar{X} > \bar{X}_B$  but  $\hat{\sigma}^2 \gg \hat{\sigma}_A^2$  and  
 203  $\hat{\sigma}^2 \gg \hat{\sigma}_B^2$ , leading to  $\bar{X}\hat{\sigma}^2 > \bar{X}_A\hat{\sigma}_A^2 + \bar{X}_B\hat{\sigma}_B^2$  and  $\zeta > 1$ , otherwise,  $\zeta \leq 1$  where  $\bar{X}$  and  $\hat{\sigma}^2$  are  
 204 respectively overall estimated mean and variance of counts for a given isoform;  $\bar{X}_i$  and  $\hat{\sigma}_i^2$   
 205 are estimated mean and variance of counts for this isoform in condition  $i$ ,  $i = 1$  for A and 2  
 206 for B. For  $\psi > 1$  and  $\zeta > 1$ , we have  $\rho > 1$ . The  $t^*$ -statistic is potentially preferable to the  $t$ -  
 207 statistic in two aspects: (1) isoforms with small counts are not easily found to have  
 208 differential expression and (2)  $t$ -values with  $\rho > \omega$  are inflated but those with  $\rho < \omega$  are  
 209 shrunken. As a result, the fudge effect is suppressed and truly differentially expressed  
 210 isoforms would be found with a high probability (very low p-value).  $\omega$  is a threshold  
 211 whose value is inversely proportional to sample size and determined by simulated null  
 212 data based on the real data. Here we simulate null data, perform our modified Beta  $t$ -  
 213 test(mBeta  $t$ -test) with setting  $\rho = 1$  and  $\omega = 1$  for all isoforms on the null simulated data,  
 214 find false DE isoforms, calculate their  $\rho$  values, then order them from the smallest to the

215 largest,  $\rho_1 < \rho_2 < \dots < \rho_j < \dots < \rho_k$ , and calculate quantiles. We set  $q_1 = 1/k, q_2 = 2/k, \dots,$   
216  $q_j = j/k, \dots, q_k = 1$  where  $k$  is number of false discoveries in a null simulated data. Setting  
217  $q_j \geq 0.85$ , then we choose  $\omega = \rho_j$  value. This means that 85% false discoveries would have  
218  $\rho \leq \omega$  and be excluded. If, however,  $k \leq 5$ , then  $q_j \geq 0.85$  is not informative. In this case, we  
219 take  $\omega = \rho_1$ . This process is done on all given simulated null datasets. We choose  
220  $\bar{\omega} = \frac{1}{S} \sum_{s=1}^S \omega_s$  over  $S$  simulated null datasets. The p-value for each  $t^*$ -value can be obtained  
221 from t-distribution using degrees of freedom given or by performing the bootstrap (Storey  
222 et al. 2005) (see Supplemental Appendix D).

223

## 224 **Simulation comparisons**

225 We used the 12 scenario stimulation datasets (see Simulation in Materials and Methods) to  
226 compare 6 statistical methods for identifying isoforms differentially expressed between  
227 two given conditions. The 6 statistical methods chosen here are Beta t-test (Baggerly et al.  
228 2003), empirical Bayesian method (Hardcastle et al. 2010), Exact test (Robinson et al.  
229 2010b; Robinson et al. 2007; Robinson et al. 2008), GLM (McCarthy et al. 2012), DESeq  
230 (Anders et al. 2010) and our new Beta t-test (mBeta t-test). The empirical Bayesian  
231 (eBayesian) method was implemented on R package baySeq and the Exact test and GLM  
232 methods on R package edgeR (Robinson et al. 2010a). DESeq was implemented by R  
233 package DESeq (Anders et al. 2010). The Beta and mBeta t-test methods were performed in  
234 Matlab. We simulated null data to determine  $\omega$  value for mBeta t-test. We set FDR cutoff =  
235 0.05 and chose estimated FDRs smaller than but closest to this cutoff as acceptable levels

236 for differential expressions of isoforms because the FDR cutoff of 0.05 is widely accepted in  
237 multiple tests, especially, in genome-wide studies. We counted isoforms identified to be  
238 differentially expressed by these methods, false discoveries and calculated means and  
239 standard deviations(stdev) of the numbers of findings and true FDRs for each method  
240 chosen and then summarized them in Tables 1-3.

241

242 For small condition effect ( $A=100$ ) or low artificial noise proportion ( $Q=10\%$ ), or low  
243 proportion ( $P=10\%$ ) of DE isoforms, the Beta t-test method had higher power. Since mBeta  
244 t-test is a modified beta t-test, in the case of low  $P$  or small  $A$ , mBeta t-test, eBaysian, Exact  
245 test and GLM had similar powers, while in higher  $P$  and larger  $A$  scenarios, Beta and mBeta  
246 t-test had lower powers than eBayesian, Exact test and GLM. In all 12 scenarios (Tables 1-  
247 3), DESeq always had very low powers. This is because DESeq always had extremely low  
248 true FDRs, indicating that DESeq is a very conservative method that would miss many true  
249 differentially expressed isoforms in practice. Beta t-test had much higher true FDRs than its  
250 estimated FDRs in all these scenarios, meaning that in the Beta t-test method's findings,  
251 there would be much more false discoveries than estimated, so this is not a conservative  
252 method. eBayesian showed higher powers in low artificial noise proportion (Tables 1 and  
253 3) but it also had higher true FDRs than estimated FDRs in most cases. In high artificial  
254 noise proportion ( $Q=30\%$ ) scenario, eBayesian performed well (Table 2). GLM showed  
255 high powers in all 12 given scenarios but its true FDRs were much larger than estimated in  
256 9 scenarios (Table 1-3), suggesting that this method is also not conservative. In low DE  
257 isoform proportion ( $P=10$ ), low artificial noise proportion ( $Q=10\%$ ) or small condition

258 effect (A=100) scenario, Exact test performed poorly because its true FDRs were much  
259 larger than its estimated values in most cases, however, in high P(30%), high Q(30%), and  
260 large A(300) scenarios, Exact test had a good performance. Similarly to DESeq, mBeta t-  
261 test also had lower true FDRs than its estimated values in all 12 given scenarios but its  
262 powers were much higher than DESeq (Tables 1-3), showing that the mBeta t-test method  
263 is conservative and powerful.

264

265 Stability is an important property of a statistical method. To rate stabilities of these  
266 statistical methods in performance, we here used standard deviations (stdev) of finding  
267 numbers and true FDRs listed in Tables 1-3 as criterion. Small stdev means that this  
268 method has a small fluctuation and hence a high stability in identification of DE isoforms,  
269 while larger stdev indicates that it has a bigger fluctuation and hence lower stability. Thus,  
270 for each scenario, we ordered these methods by using stdev from the smallest to the  
271 largest, assigned order scores (from 1 to 6) to them and averaged their order scores over  
272 12 scenarios. Thus, the order score can be used to measure relative stability of a method:  
273 the smaller order score, the higher stability. Table 4 summarizes the results of stability  
274 analysis. For findings, mBeta t-test had the highest stability, while GLM had the lowest.  
275 Beta t-test, eBayesian, DESeq and Exact test got similar order scores and so they had  
276 proximate stabilities. For true FDR, as expected, DESeq showed the highest stability. mBeta  
277 t-test was in the second highest rank. GLM and Beta t-test were lowest. Exact test and  
278 eBayesian showed similar stabilities.

279

280 To comprehensively rate these statistical methods, we follow Tan (Tan 2011) and define  
281 work efficiency of a statistical method as

$$282 \quad w = \phi\varphi \quad (11)$$

283 where  $\phi = \frac{N_f}{NP}$  and  $\varphi = 1$  if true FDR  $\leq 0.05$  and  $\varphi = 0$ , otherwise. Here  $N$  is number of  
284 isoforms in simulated data,  $P$ , proportion of DE isoforms given in simulation,  $N_p = NP$ , and  
285  $N_f$ , number of isoforms found to be differentially expressed by a statistical method.  $\phi$  is  
286 used to measure power (ability or probability) of a statistical method for identifying a  
287 differentially expressed isoform and  $\varphi$  to measure conservativeness of this method. The  
288 performance of a method must be evaluated by its power and conservativeness. If a  
289 method has a high power to find DE isoforms with no conservativeness, its findings would  
290 then be unreliable and incredible; if a method has a low power with high conservativeness,  
291 then the method would loss many findings. So such two types of statistical methods would  
292 have low work efficiencies in identification of DE isoforms.

293

294 Table 5 lists work efficiencies of the 6 large-scale statistical methods in 4 pairs of scenarios.  
295 From Table 5, one can find that eBayesian and GLM had higher work efficiencies in 3  
296 replicate libraries than in 5 replicate libraries. This is because in 5 replicate libraries, the  
297 two methods underestimated FDR at cutoff  $\alpha=0.05$  (Tables 1-3) so that they lost  
298 conservativeness. Beta t-test had work efficiency of zero in all scenarios. Exact test had  
299 lower efficiencies in low  $P$ , low  $Q$ , small  $A$  and 3 replicates than in high  $P$ , high  $Q$ , large  $A$

300 and 5 replicates. For the DESeq and mBeta t-test approaches, the work efficiency was  
301 greatly raised with increment of sample size. This is due to the fact that the two methods  
302 promoted its power with the same conservativeness. Similar results also can be seen in  
303 condition effects  $A=100$  versus  $A=300$ . These two methods did not significantly respond to  
304 change in proportion of DE isoforms and in artificial noise proportion. However, in all  
305 simulated scenarios, the mBeta t-test method showed the highest work efficiencies.

306

307 In order to display FDR profiles along FDR cutoff, we here plotted averaged true FDRs  
308 against averaged estimated FDRs by these compared methods from cutoff =  $\sim 0$  to  $\sim 0.21$   
309 in scenario 1. To evaluate the FDR profiles of these statistical methods, we also plotted a  
310 theoretical FDR profile (a diagonal line for true FDR against true FDR) for each method.  
311 Figure 1 shows that the estimated FDR curves of eBayesian, GLM and Exact test and Beta t-  
312 test are much below their theoretical lines, indicating that these methods, especially, Beta t-  
313 test, indeed heavily underestimated their FDRs, while DESeq too much overestimated its  
314 FDRs along the cutoff. Therefore, DESeq indeed is a too stringent and too conservative  
315 method. The mBeta t-test method overestimated FDR and hence is conservative.

316

### 317 **Real experimental data**

318 The simulated data are generally made in a known distribution and all factors impacting on  
319 differential expressions are well controlled, hence evaluation of these statistical methods  
320 on the simulated data is conducted in ideal and known states. Obviously, such an evaluation



321 has a limited significance for their application. Real data are therefore required in  
322 comparison of statistical methods. However, since everything, in particular, noise  
323 distribution in real data is unknown, a direct evaluation of statistical methods is impossibly  
324 realized by comparison between true and estimated FDRs. For this reason, we here  
325 employed an indirect way for doing so. First, we compared the performances of these  
326 statistical methods on our two real datasets: Jurkat T-cell isoform transcriptomic data and  
327 Jurkat T-cell gene transcriptomic data. The Jurkat T-cell isoform dataset contains 64428  
328 isoforms which attribute to 14603 genes. These 64428 isoforms were annotated according  
329 to alternative poly(A) and cleavage sites within genes and studied on differential  
330 transcriptions between resting and stimulating immune states each with 3 replicate  
331 libraries by using PAS-seq (Shepard et al. 2011). We used edgeR (Robinson et al. 2010a) to  
332 normalize the Jurkat T-cell isoform and gene data. After filtering, 13409 isoforms in the  
333 isoform data and 9572 genes in the gene data were available for differential expression  
334 analyses. eBayesian had no results because either it was running too long (over at least 2  
335 days in isoform data, infinite loop might occur) or showed NA result (in gene data). GLM  
336 obtained 4376 genes and 5039 isoforms of being differentially expressed from our gene  
337 and isoform data, respectively, at FDR cutoff of 0.05. Since ratios of findings are so high  
338 (45% in the gene data and 37% in the isoform data), we did not believe that this method  
339 could work on these real data. DESeq found 261 DE genes and 287 DE isoforms at the same  
340 FDR cutoff. The ratios of findings are so low (3% in gene data and 2% in isoform data),  
341 basically, DESeq also did not work on the two transcriptomic data. The Beta t-test, mBeta t-  
342 test and Exact test methods worked and the results obtained at FDR cutoff of 0.05 are listed  
343 in Table 6.

344

345 In the next step, we compared their findings using Venn Diagram Generator  
346 (<http://simbioinf.com/mcbc/applications/genevenn/>). Figure 2A shows that except that  
347 the three methods shared 554 DE genes, Exact test and mBeta t-test shared 22 DE genes in  
348 their 2019 findings while the former and Beta t-test shared merely 3 DE genes in their  
349 2760 findings. Similar result was also found in the isoform data (Fig. 2B). In addition, if a  
350 gene was found to be differentially expressed by a method only, then it is highly possible  
351 that this DE gene would be falsely discovered. Figure 3 visualizes heat maps of 10 genes  
352 identified to be differentially expressed by mBeta t-test method (Fig. 3A), 770 by Beta t-test  
353 only (Fig. 3B), and 220 by Exact test only (Fig. 3c). Indeed, the method-specific genes do not  
354 display obvious expression difference between no stimulation (NS) and 48h  
355 poststimulation. Thus, we defined no share ratio of findings ( $m_i / M_i$  where  $m_i$  is number of  
356 method  $i$ -specific findings, and  $M_i$  is numbers of findings identified by method  $i$ ) as least  
357 true false discovery rate (least true FDR is corresponding to q-value defined by Storey et  
358 (Storey et al. 2003)). Using this indirect method, we obtained the least true FDRs for the  
359 findings of the Exact test, mBeta t-test and Beta t-test methods, respectively, in the two real  
360 transcriptomic datasets (Table 6). From Table 6, one can see that Exact test and Beta t-test  
361 extremely underestimated their FDRs while mBeta t-test still overestimated FDR in its  
362 findings. These are well consistent with those found in the simulated data.

363

## 364 **Experimental Validation**

365 qRT-PCR experiments were carried out to valid our method's findings. Our qRT-PCR  
366 experiments were done in Jurkat T-cells at rest and 48 hours after stimulation. To make  
367 our qRT-PCR results be more representative, we randomly chose the genes that were found  
368 to be up-regulated or down-regulated at 48 hours after stimulation and not to be  
369 differentially expressed by mBeta t-test. We used relative differences between stimulation  
370 and rest and relative variation coefficient (VC) (see Materials and Methods Section) to do  
371 comparison between the RNA-seq and qRT-PCR data. The results show that genes UBL3,  
372 MST123 and KIAA0465 that were found to be up-regulated to respond to stimulation (blue  
373 columns in Fig. 4A) in RNA-seq data also displayed positive response to stimulation in qRT-  
374 PCR data (red columns in Fig. 4A). Gene CD47 negatively responded to stimulation in both  
375 datasets while gene TESK2 was not detected to have significantly difference between  
376 stimulation and rest in these two datasets. In expression direction and relative expression  
377 amount, these two datasets show  $cc=0.9$  (Pearson correlation coefficient) (Fig. 4 A),  
378 suggesting that our transcriptomic data were well consistent with qRT-PCR data. Using  
379 relative VC, we found that gene UBL3 had small expression noise at rest and stimulation in  
380 these two datasets, while genes TESK2 had bigger expression noises in the transcriptomic  
381 data (Fig. 4 B). This is why gene UBL3 was detected to be differentially expressed but  
382 TESK2 was not though both UBL3 and TESK2 had small counts of mRNA reads in  
383 transcriptomic data.

384

385

## Discussion

386 Although our simulated data were made in the NB distributions, Beta and mBeta t-test  
387 worked well if estimation of FDR was not considered. This is because not only the NB  
388 counts can be well approximated by binomial distributions but also the frequencies (p) of  
389 counts of mRNA reads in libraries can be approximated by beta distributions. While the  
390 eBayesian, GLM, Exact test, and DESeq approaches are merely based on the NB distribution.  
391 Therefore, for real datasets whose distributions are often unknown, mBeta t-test will  
392 perform well. For example, as seen in Result Section, eBayesian and GLM, DESeq could not  
393 work on our Jurkat T-cell isoform and gene data, while Exact test, Beta t-test and mBeta t-  
394 test worked even though their results have big differences. We also applied these methods  
395 to our leukemia transcriptomic data containing 10299 genes (data not yet published), the  
396 results show that all methods chosen can work but eBayesian has very low power (it just  
397 found 165 DE genes), while GLM, Exact test and mBeta t-test identified, respectively, 780,  
398 733 and 711 DE genes and hence performed very similarly. These strongly suggest that  
399 eBayesian and GLM are specific to the NB distribution.

400

401 In addition, in genome-wide data, especially, in transcriptomic data, sample sizes usually  
402 are very small, for example, 3 or 2 replicate libraries in each condition due to high cost and  
403 biological resource limitation. Small samples would lead to a fudge effect (Tan 2011; Tan et  
404 al. 2011; Tan et al. 2006). For example, in count data containing more than ten thousands of  
405 isoforms, two 3-replicate small-count sets would have a larger probability of showing that  
406 they would be sampled from the same distribution not only than two 5-replicate small-  
407 count sets but also than two 3-replicate big-count sets. On the other hand, in

408 transcriptome-wide data, small-count data have more chance to be weakly fluctuated by  
409 noise and to form extremely small within-variances than big-count data, giving rise to  
410 inflating t-statistics. For general statistical methods, the genes or isoforms with small count  
411 data in small samples would easily be found to be differentially expressed between  
412 conditions due to inflation of statistic. To address this problem, many methods developed  
413 for identifying differentially expressed genes in microarray data introduce a constant to  
414 shrink statistics. For example, In SAM (Tusher et al. 2001), two-sample t-test is modified as  
415 S-test by adding a minimized coefficient of variation  $S_0$  of differences between two  
416 conditions to denominator. In the regularized  $t$  test (Baldi et al. 2001), two-sample t-test is  
417 modified by combining gene-specific variance with global average variance. The two  
418 methods shrink all t-statistics across the whole genes detected in microarrays. So they have  
419 low powers (Tan 2011). Tan et al (Tan et al. 2006) used a conditional shrinking method to  
420 address the problem of inflating t-test. But this conditional shrinking method cannot be  
421 introduced to Beta t-test because the Beta t-test is based on differences in frequencies  
422 (proportions) of tags between conditions (Baggerly et al. 2003).

423

424 Baggerly et al (Baggerly et al. 2003) employed a weighting and iteration strategy to look for  
425 an optimal estimation of parameters beta and alpha of frequency that is assumed to follow  
426 beta distribution for a tag in a condition and furthermore developed a new t-test, we called  
427 Beta t-test. Weight and optimization is a strategy for excluding artificial or technical noise  
428 in count data. Although Baggerly et al (Baggerly et al. 2003) recognized small-count effect  
429 on t-tests and tried to avoid the problem of t-value inflation using alternative variance

430 given in Equation (18a), our practice demonstrated that Equation (18a) does not  
431 substantially reduce the fudge effect. For this reason, we modify the alternative variances  
432 by utilizing means of total counts over all libraries in a condition for those isoforms with  
433 very small counts. Analytically, it can be seen that the alternative variance defined in  
434 Equation (18b) is larger than that in Equation (18a). Our simulation really showed that the  
435 above small-count effect on testing for differential expressions of isoforms was mostly  
436 reduced by our modified alternative variances.

437

438 In order to eliminate small sample effect, we introduced a gene-or isoform-specific variable  
439  $\rho$  into the Baggerly et al.s' (Baggerly et al. 2003)Beta t-test.  $\rho$  is used to measure overlap  
440 between two count sets. If two count sets more overlap, then  $\rho$  becomes smaller; if two  
441 count sets separate, then  $\rho > 1$ . The larger gap between two count sets, the larger  $\rho$ . In  
442 theory, two count sets that are separated have a higher probability of showing that they  
443 came from two different populations than those that overlap. Besides, if noise within count  
444 sets is large, then  $\zeta$  is small, which makes  $\rho$  become small. Thus,  $\rho$  shrinks t-values of  
445 overlapped count sets and inflates t-values of separated count sets with small noise. As  
446 seen in Tables 1-3, compared to the Beta t-test method, our mBeta t-test approach did not  
447 obviously decrease its power but significantly reduce false discovery rate so that it has  
448 higher work efficiencies. Considering sample size effect, we set a threshold  $\omega$  for  $\rho$ . That  
449 is, t-values are inflated with  $\rho > \omega$ , or shrunken with  $\rho < \omega$ . As a result, almost all of small  
450 t-values are compressed into a short interval close to zero but the t-values with  $\rho > \omega$  are  
451 further enlarged and a region in which truly differential expressions of isoforms and

452 expression noises are mixedly distributed becomes very narrow(Fig. 5). Since p-value only  
453 depends on t-value given degree of freedom, p-values with inflating t-values become  
454 smaller while those with shrinking t-values become larger. Thus a lot of false discoveries  
455 are also compressed into the zero neighbors so that very few false positives would be  
456 found (Fig.5). Threshold  $\omega$  depends on sample size. The larger sample size, the smaller  $\omega$ .  
457 However, when sample size is large,  $\omega$  becomes very small, ability of  $\rho$  controlling false  
458 discoveries becomes very weak because the gaps between two datasets are vanished and  
459 there is not fudge effect in such data.

460

461 ROC is popularly used to evaluate statistical methods (Hardcastle et al. 2010) (Robinson et  
462 al. 2007) but ROC has two fatal drawbacks. First, ROC cannot evaluate the FDR estimation.  
463 For multiple tests, since FDRs are unknown, they must be estimated so that one can  
464 determine which features have statistical significances. Precise or conservative estimation  
465 of FDRs is important for an experimental scientist or statistician to choose a statistical  
466 method in practice because if a method significantly underestimates FDRs in findings, then  
467 it would provide much more false findings than expected or if it much overestimates FDRs,  
468 we would then loss many true findings (Tan 2011). Second, in some cases, the ROC curves  
469 of the methods are tightly close to each other or overlap together, meaning that these  
470 methods have similar sensitivity against specificity but it does not suggest that they have  
471 the same or approximate performances because they may have different estimations of  
472 FDRs. For example, we employed simulated data of scenarios 1 and 4 to makeup  
473 eBayesian, Exact test, DESeq and mBeta t-test ROC curves. The results show that mBeta t-

474 test performed best at specificity < 0.3 in scenario 1 (Fig. 6A) or < 0.5 in scenario 4 (Fig. 6B),  
475 DESeq had the slight higher sensitivity than mBeta t-test when specificity > 0.3 in scenario  
476 1 (Fig. 6 A) or > 0.5 in scenario 4 (Fig. 6B), eBayesian had the lowest curve, Exact test and  
477 GLM had almost the same curve, performed better than eBayesian when specificity > 0.4  
478 (Fig. 6). However, these ROC curves did not show significant difference, in particular, in  
479 scenario 4. For this reason, our evaluation of these methods chosen was based on  
480 comparison between true and estimated FDRs. The simulated data showed that the  
481 eBayesian and GLM methods worked well in the ideal NB distributions, lower proportions  
482 of DE isoforms, smaller condition effect and smaller number of replicate libraries but they  
483 performed poorly in the case in which sample sizes were larger and proportion of DE  
484 isoform was higher or condition effect was bigger. This is because in such a scenario they  
485 generally had a high power to find DE isoforms but, on the other hand, their FDRs are often  
486 notably underestimated. Therefore, we evaluated performance of a statistical method in  
487 power (ability or probability to find DE genes or isoforms) and conservativeness of FDR  
488 estimation (reliability of findings). A statistical method with high power but no  
489 conservativeness of FDR estimation would offer us a lot of unreliable findings or a  
490 statistical method with low power but conservativeness would miss many true DE genes or  
491 isoforms. That is to say, these two types of methods would have low work efficiency to  
492 perform their statistical analysis of real data.

493

494 It is required to indicate that the Exact test method performs very fast, in contrast, the  
495 eBayesian method (baySeq) is very intensive in computation and took a long time (maybe



496 infinite loop occurred in calculation of posterior probabilities when performed on our real  
497 data). Nevertheless, the current version of baySeq is not available for our real data. The  
498 mBeta t-test method is also computationally intensive because it runs iteratively to look for  
499 an optimal estimation of weight and beta and alpha parameters for each isoform. However,  
500 it finishes its work in 15 minutes for more 10 thousands of isoforms if we don't use  
501 bootstrap to calculate p-values.

502

## 503 **Materials and Methods**

### 504 **Cell Lines and Stimulation**

505 Jurkat T-cell lines were obtained from the ATCC and maintained in RPMI (ATCC) with 10%  
506 fetal bovine serum supplemented with penicillin and streptomycin (Gibco). Jurkat T-cells  
507 were stimulated with plate-bound antibodies coated with a solution of 1  $\mu$ g anti-CD3  
508 (OKT3 – eBiosciences) and 5  $\mu$ g anti-CD28 (CD28.2 – BD Pharmingen). Activation of T-cell  
509 was monitored via flow cytometry detection of CD69 expression (FN-50) 48 hours after  
510 stimulation (Simms et al. 1996).

511

### 512 **High-throughput Sequencing Library Generation**

513 Total RNA was harvested from resting and stimulated cells with Trizol reagent and  
514 processed as per manufacturer instructions. Polyadenylated RNA was isolated with the  
515 Poly(A)-Purist MAG kit as per manufacturer instructions. Libraries for high-throughput

516 sequencing were established as described (Shepard et al. 2011) with minor modifications.  
517 Libraries were sequenced via 50 bp paired-end sequencing on an Illumina GAIIx in genome  
518 sequencing center in Baylor College of Medicine. The listed reagents were from Life  
519 Technologies.

520

### 521 **Annotation and pipeline analyses**

522 Paired-end reads were first subjected to a profiler removing A and T homopolymer runs  
523 within the forward and reverse reads, respectively. Pairs in which the length of both reads  
524 was greater than 25 bp were mapped to the human genome reference (UCSC hg19) with  
525 Bowtie(Langmead et al. 2009) using default parameters. The reads were simultaneously  
526 mapped to the UCSC KnownGene database to identify putative exon-spanning reads or  
527 pairs. The union of mate pairs mapping uniquely to the genome and those mapping  
528 specifically to the KnownGene database were condensed to isoforms by 3' alignment  
529 identity, filtered for false priming, and assigned gene identity and region (e.g. CDS, 3' UTR)  
530 using UCSC KnownGene annotations. Cleavage and polyadenylation sites were defined as  
531 the median genome coordinate of all reads within a 20-base pair sliding window of an  
532 adjacent read. Defined sites were carried forward for analysis only if they were present in  
533 all libraries representing an individual cellular type or state. Intralibrary isoform  
534 representation was normalized to pseudocounts using the negative binomial  
535 method(Robinson et al. 2008).

536

## 537 **qRT-PCR**

538 Total RNA was respectively isolated from Jurkat T-cells at rest and 48hours after stimulation using  
539 TRIZOL(Invitrogen). RNA was digested with DNase I to remove contaminating genomic DNA.  
540 One microgram of total RNA was used to generate cDNA with the ImProm-II™ Reverse  
541 Transcription System (Promega) and real-time PCR was performed in triplicates in an  
542 Eppendorf Mastercycler. qRT-PCR was performed using a pair of primers(forward and  
543 reverse primers) designed for a selected gene.  $\Delta\Delta C_T$  method was used to calculate relative  
544 quantitation of qRT-PCR product on a 7500 Fast Real-Time PCR machine with SDS software  
545 (Applied Biosystems).

546

## 547 **Simulations**

548 To evaluate statistical properties of various approaches, we used the NB pseudorandom  
549 generator to create RNA isoform count datasets in 12 scenarios, each repeated three times  
550 for calculations of means and standard deviations. Our simulations were conducted on our  
551 Jurkat T-cell isoform data from which we took 18290 isoforms and 3 replicated libraries in  
552 each of two conditions (resting and stimulating states). We set two levels (A=100 and 300)  
553 of condition (or treatment) effect on differential transcription of isoforms and linearly  
554 assigned the effects  $\tau = UA$  to differentially expressed isoforms where U is uniform variable  
555 ( $U \in (0,1]$ ), two levels of proportions of differentially expressed isoforms: P =10 and 30%,  
556 two levels of artificial noise proportions: Q=10 and 30% and 2 levels of sample sizes: R=3  
557 and 5 replicate libraries. Here artificial noise (also called technique or Poisson noise)  
558 indicates that the noise does not comes from experimental system error but come from

559 techniques such as sequencing, mapping, annotation and pipeline analysis, etc. In simulated  
560 data, isoforms with averaged count <5 were filtered, thus 18162 isoforms were available for  
561 analysis.

562

## 563 **Software**

564 A package for implementing mBeta t-test was written in Matlab and a program for  
565 generating simulation data was written in R. They are available for request.

566

## 567 **Acknowledgement**

568 We are indebted to Natee Kongchan for library preparation and Alexander Ruch and Jixin  
569 Deng for primary processing of our data sets. This work was funded by The Cancer  
570 Prevention and Research Institute of Texas (HIRP100475) and the National Cancer  
571 Institute (CA126752, CA131474).

572

## 573 **References**

- 574 Anders, S. and Huber, W. 2010. Differential expression analysis for sequence count data. *Genome Biol*  
575 **11**: R106.
- 576 Baggerly, K.A., Deng, L., Morris, J.S., and Aldaz, C.M. 2003. Differential expression in SAGE: accounting  
577 for normal between-library variation. *Bioinformatics* **19**: 1477-1483.
- 578 Baggerly, K.A., Deng, L., Morris, J.S., and Aldaz, C.M. 2004. Overdispersed logistic regression for SAGE:  
579 modelling multiple groups and covariates. *BMC Bioinformatics* **5**: 144.
- 580 Baldi, P. and Long, A.D. 2001. A Bayesian framework for the analysis of microarray expression data:  
581 regularized t -test and statistical inferences of gene changes. *Bioinformatics* **17**: 509-519.

- 582 Cloonan, N., Forrest, A.R., Kollé, G., Gardiner, B.B., Faulkner, G.J., Brown, M.K., Taylor, D.F., Steptoe, A.L.,  
583 Wani, S., Bethel, G. et al. 2008a. Stem cell transcriptome profiling via massive-scale mRNA  
584 sequencing. *Nat Methods* **5**: 613-619.
- 585 Cloonan, N. and Grimmond, S.M. 2008b. Transcriptome content and dynamics at single-nucleotide  
586 resolution. *Genome Biol* **9**: 234.
- 587 Degner, J.F., Marioni, J.C., Pai, A.A., Pickrell, J.K., Nkadori, E., Gilad, Y., and Pritchard, J.K. 2009. Effect of  
588 read-mapping biases on detecting allele-specific expression from RNA-sequencing data.  
589 *Bioinformatics* **25**: 3207-3212.
- 590 Denoeud, F., Aury, J.M., Da Silva, C., Noel, B., Rogier, O., Delledonne, M., Morgante, M., Valle, G.,  
591 Wincker, P., Scarpelli, C. et al. 2008. Annotating genomes with massive-scale RNA sequencing.  
592 *Genome Biol* **9**: R175.
- 593 Hardcastle, T.J. and Kelly, K.A. 2010. baySeq: empirical Bayesian methods for identifying differential  
594 expression in sequence count data. *BMC Bioinformatics* **11**: 422.
- 595 Kal, A.J., van Zonneveld, A.J., Benes, V., van den Berg, M., Koerkamp, M.G., Albermann, K., Strack, N.,  
596 Ruijter, J.M., Richter, A., Dujon, B. et al. 1999. Dynamics of gene expression revealed by  
597 comparison of serial analysis of gene expression transcript profiles from yeast grown on two  
598 different carbon sources. *Mol Biol Cell* **10**: 1859-1872.
- 599 Langmead, B., Trapnell, C., Pop, M., and Salzberg, S.L. 2009. Ultrafast and memory-efficient alignment of  
600 short DNA sequences to the human genome. *Genome Biol* **10**: R25.
- 601 Li, J., Jiang, H., and Wong, W.H. 2010. Modeling non-uniformity in short-read rates in RNA-Seq data.  
602 *Genome Biol* **11**: R50.
- 603 Madden, S.L., Galella, E.A., Zhu, J., Bertelsen, A.H., and Beaudry, G.A. 1997. SAGE transcript profiles for  
604 p53-dependent growth regulation. *Oncogene* **15**: 1079-1085.
- 605 Man, M.Z., Wang, X., and Wang, Y. 2000. POWER\_SAGE: comparing statistical tests for SAGE  
606 experiments. *Bioinformatics* **16**: 953-959.
- 607 McCarthy, D.J., Chen, Y., and Smyth, G.K. 2012. Differential expression analysis of multifactor RNA-Seq  
608 experiments with respect to biological variation. *Nucleic Acids Res* **40**: 4288-4297.
- 609 Michiels, E.M., Oussoren, E., Van Groenigen, M., Pauws, E., Bossuyt, P.M., Voute, P.A., and Baas, F. 1999.  
610 Genes differentially expressed in medulloblastoma and fetal brain. *Physiol Genomics* **1**: 83-91.
- 611 Montgomery, S.B., Sammeth, M., Gutierrez-Arcelus, M., Lach, R.P., Ingle, C., Nisbett, J., Guigo, R., and  
612 Dermitzakis, E.T. 2010. Transcriptome genetics using second generation sequencing in a  
613 Caucasian population. *Nature* **464**: 773-777.
- 614 Morrissy, A.S., Morin, R.D., Delaney, A., Zeng, T., McDonald, H., Jones, S., Zhao, Y., Hirst, M., and Marra,  
615 M.A. 2009. Next-generation tag sequencing for cancer gene expression profiling. *Genome Res*  
616 **19**: 1825-1835.
- 617 Mortazavi, A., Williams, B.A., McCue, K., Schaeffer, L., and Wold, B. 2008. Mapping and quantifying  
618 mammalian transcriptomes by RNA-Seq. *Nat Methods* **5**: 621-628.
- 619 Pan, Q., Shai, O., Lee, L.J., Frey, B.J., and Blencowe, B.J. 2008. Deep surveying of alternative splicing  
620 complexity in the human transcriptome by high-throughput sequencing. *Nat Genet* **40**: 1413-  
621 1415.
- 622 Robinson, M.D., McCarthy, D.J., and Smyth, G.K. 2010a. edgeR: a Bioconductor package for differential  
623 expression analysis of digital gene expression data. *Bioinformatics* **26**: 139-140.
- 624 Robinson, M.D. and Oshlack, A. 2010b. A scaling normalization method for differential expression  
625 analysis of RNA-seq data. *Genome Biol* **11**: R25.
- 626 Robinson, M.D. and Smyth, G.K. 2007. Moderated statistical tests for assessing differences in tag  
627 abundance. *Bioinformatics* **23**: 2881-2887.
- 628 Robinson, M.D. and Smyth, G.K. 2008. Small-sample estimation of negative binomial dispersion, with  
629 applications to SAGE data. *Biostatistics* **9**: 321-332.

- 630 Shepard, P.J., Choi, E.A., Lu, J., Flanagan, L.A., Hertel, K.J., and Shi, Y. 2011. Complex and dynamic  
 631 landscape of RNA polyadenylation revealed by PAS-Seq. *RNA* **17**: 761-772.
- 632 Simms, P.E. and Ellis, T.M. 1996. Utility of flow cytometric detection of CD69 expression as a rapid  
 633 method for determining poly- and oligoclonal lymphocyte activation. *Clin Diagn Lab Immunol* **3**:  
 634 301-304.
- 635 Storey, J.D. and Tibshirani, R. 2003. Statistical significance for genomewide studies. *Proc Natl Acad Sci U*  
 636 *S A* **100**: 9440-9445.
- 637 Storey, J.D., Xiao, W., Leek, J.T., Tompkins, R.G., and Davis, R.W. 2005. Significance analysis of time  
 638 course microarray experiments. *Proc Natl Acad Sci U S A* **102**: 12837-12842.
- 639 t Hoen, P.A., Ariyurek, Y., Thygesen, H.H., Vreugdenhil, E., Vossen, R.H., de Menezes, R.X., Boer, J.M.,  
 640 van Ommen, G.J., and den Dunnen, J.T. 2008. Deep sequencing-based expression analysis shows  
 641 major advances in robustness, resolution and inter-lab portability over five microarray  
 642 platforms. *Nucleic Acids Res* **36**: e141.
- 643 Tan, Y.D. 2011. Work efficiency: A new criterion for comprehensive comparison and evaluation of  
 644 statistical methods in large-scale identification of differentially expressed genes. *Genomics* **98**:  
 645 390-399.
- 646 Tan, Y.D. and Fornage, M. 2011. Effects of genetic and environmental factors and gene-environment  
 647 interaction on expression variations of genes related to stroke in rat brain. *American Journal of*  
 648 *Molecular Biology* **1**: 87-113
- 649 Tan, Y.D., Fornage, M., and Fu, Y.X. 2006. Ranking analysis of microarray data: a powerful method for  
 650 identifying differentially expressed genes. *Genomics* **88**: 846-854.
- 651 Tusher, V.G., Tibshirani, R., and Chu, G. 2001. Significance analysis of microarrays applied to the ionizing  
 652 radiation response. *Proc Natl Acad Sci U S A* **98**: 5116-5121.
- 653 Wang, L., Feng, Z., Wang, X., and Zhang, X. 2010. DEGseq: an R package for identifying differentially  
 654 expressed genes from RNA-seq data. *Bioinformatics* **26**: 136-138.
- 655 Wang, Z., Gerstein, M., and Snyder, M. 2009. RNA-Seq: a revolutionary tool for transcriptomics. *Nat Rev*  
 656 *Genet* **10**: 57-63.
- 657 Wu, Z.J., Meyer, C.A., Choudhury, S., Shipitsin, M., Maruyama, R., Bessarabova, M., Nikolskaya, T.,  
 658 Sukumar, S., Schwartzman, A., Liu, J.S. et al. 2010. Gene expression profiling of human breast  
 659 tissue samples using SAGE-Seq. *Genome Res* **20**: 1730-1739.
- 660 Zhang, L., Zhou, W., Velculescu, V.E., Kern, S.E., Hruban, R.H., Hamilton, S.R., Vogelstein, B., and Kinzler,  
 661 K.W. 1997. Gene expression profiles in normal and cancer cells. *Science* **276**: 1268-1272.

662  
 663

664

## 665 Figure legends

### 666 Figure 1 Profiles of true versus estimated FDR

667 Estimated curve was made by plotting estimated FDR against true FDR along cutoff of  $\sim 0$  to  $\sim 0.21$  and  
 668 theoretical line is a diagonal line made by plotting true FDR against true FDR along the same cutoff. The true  
 669 FDR was calculated by counting false positives in findings of a statistical method at an FDR cutoff point in a

670 simulated dataset and the estimated FDR was predicted by a statistical method. The true and estimated FDRs  
 671 given figure 1 were averaged over three simulated datasets in scenario 1.

672 Figure 2 Venn diagram analyses of the Exact test, Beta t-test and mBeta t-test approaches

673 A: DE genes found in Jurkat T-cell gene transcriptomic data. B: DE isoforms found in Jurkat T-cell isoform  
 674 transcriptomic data.

675 Figure 3 Heatmaps of method-specific differentially expressed genes

676 NS.A, NS.B, NS.C are replicate libraries A, B and C in resting state (no stimulation). 48h.A, 48h.B and 48h.C are  
 677 replicate libraries A, B and C in stimulating state (48h poststimulation). Method-specific DE genes were  
 678 treated as false DE genes. Heatmaps show that these genes really do not have obvious expression difference  
 679 between resting and stimulating states. A: 10 DE genes found by mBeta t-test only. B: 770 DE genes found by  
 680 Beta test only. C: 220 DE genes found by Exact test only.

681 Figure 4 Comparison between RNA-seq data and qRT-PCR data on 5 genes chosen.

682 In RNA-seq data genes UBL3, MST123, CD47 and KIAA0465 were found to be differentially expressed  
 683 between rest and stimulation. TESK2 had no differential expression. Genes UBL3, MST123, KIAA0465 were  
 684 significantly higher at stimulation than at rest, while genes CD47 and BCL11B were significantly lower at  
 685 stimulation than at rest.

686 A: Relative expression comparisons of 5 genes between RNA-seq and qRT-PCR. In RNA-Seq data, relative  
 687 expression of a gene is defined as  $d_g / \bar{d}$  where  $d_g = \bar{n}_{gt} - \bar{n}_{g0}$ ,  $\bar{d}$  is averaged value,  $g =$  UBL3, MST123,  
 688 CD47, KIAA0465 and TESK2,  $\bar{n}$  is averaged count of reads over three replicates and  $t = 48$  hour. In qRT-PCR,  
 689 the relative expression of a gene is defined as  $\Delta_g - \Delta_b$  where  $\Delta_g = \overline{CT}_{gt} - \overline{CT}_{g0}$ ,  $b =$  background gene for  
 690 control, and  $\overline{CT}$  is averaged CT value over three replicates and CT is log2 transformed threshold value of  
 691 amplification in qRT-PCR. In our experiment, we used TBP (TATA binding protein) as background expression  
 692 because it has no change in expression with time.

693 B: Relative expression variation coefficient comparison of 5 genes between RNA-seq and qPCR data. Relative  
 694 expression variation coefficient is defined as  $VC_{gt} / \overline{VC}_t$  where  $VC_{gt} = \bar{n}_{gt} / s_{gt}$  and  $\overline{VC}_t$  is averaged  
 695 variation coefficient over all selected genes at time  $t$  of stimulation.

696 Figure 5 Plots of t-statistics versus log FC.

697 logFC=log (mean in 48h poststimulation/mean in NS) and t-values were given by two beta t-test methods  
 698 from the simulated data in which 10% of isoforms randomly assigned with condition effect  $\tau \leq 100$  were

699 differentially expressed between two conditions each with three replicate libraries. Simulation was  
700 conducted by NB pseudorandom generator based on real isoform transcriptomic data.

701 A The Beta t-statistics are distributed in interval between -16 and 16, while those for no differential  
702 expressed genes in Beta t-test are distributed in interval between -4.8 and 4.8. Thus a lot of false discoveries  
703 (blue dots) are distributed in the neighboring areas of  $t\text{-value} \geq 4.8$  or  $t\text{-value} \leq -4.8$ .

704 B: Plots of the mBeta t-statistics versus log FC. The t-statistic interval is enlarged from below -50 to over 100,  
705 while the t-statistics for no differential expressed genes are strongly compressed into a very narrow area  
706 close to zero. Thus a lot of false discoveries of the Beta t-test method are also moved into this area so that  
707 very few false positives (blue dots) would be found.

### 708 Figure 6 ROC comparison of statistical methods

709 ROC curves of the eBayesian, Exact test, GLM, DESeq and mBeta t-test methods were made from simulated  
710 datasets. Sensitivity = true positive fraction (TPF) and specificity = false positive fraction(FPF). A: simulated  
711 data came from scenario 1(proportion of differentially expressed isoforms =10%, technical noise proportion=  
712 10% and treatment effect A= 100, sample size = 3) and B: from scenario 4(proportion of differentially  
713 expressed isoforms =30%, technical noise proportion= 10% and treatment effect A= 300, sample size = 3).

714

715

716

717

718

719

720

721

722

723

724

725



726

727

728

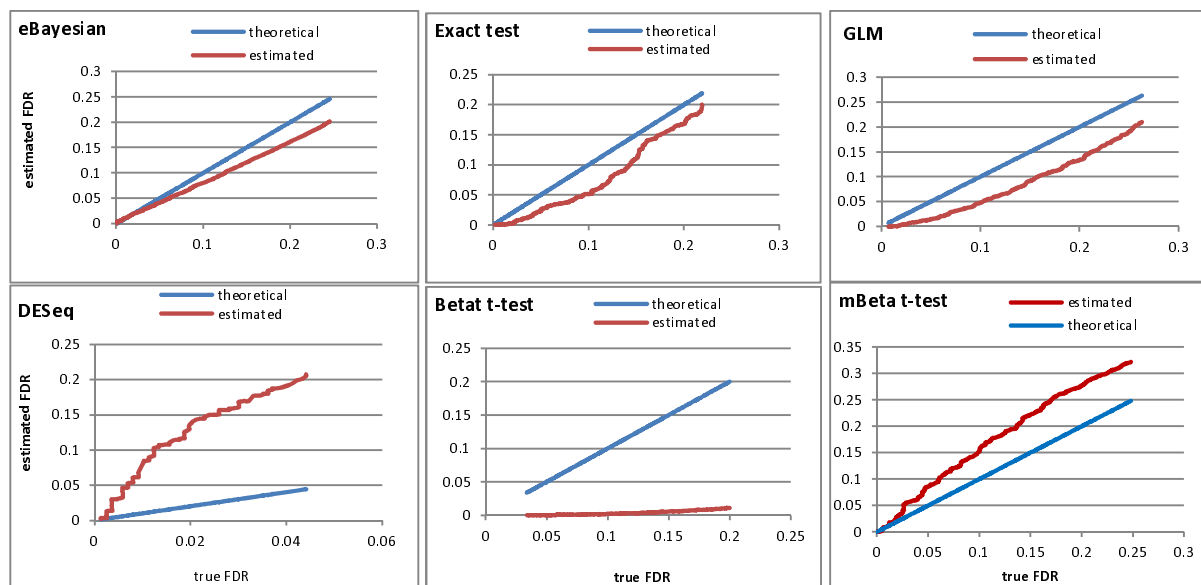

729

730

731

Figure 1

732

733

734

735

736

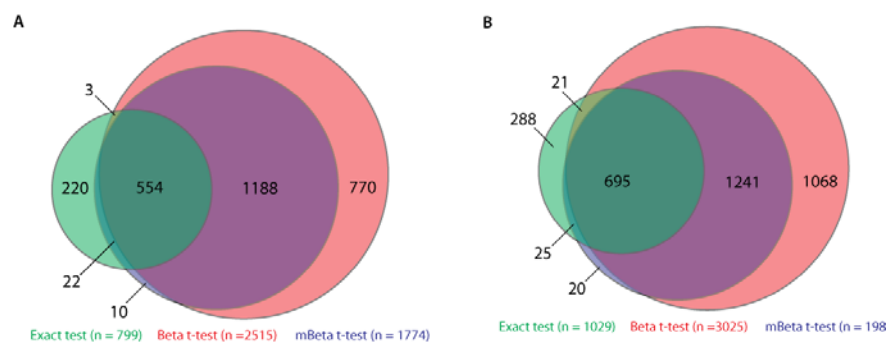

737

738

Figure 2

739

740

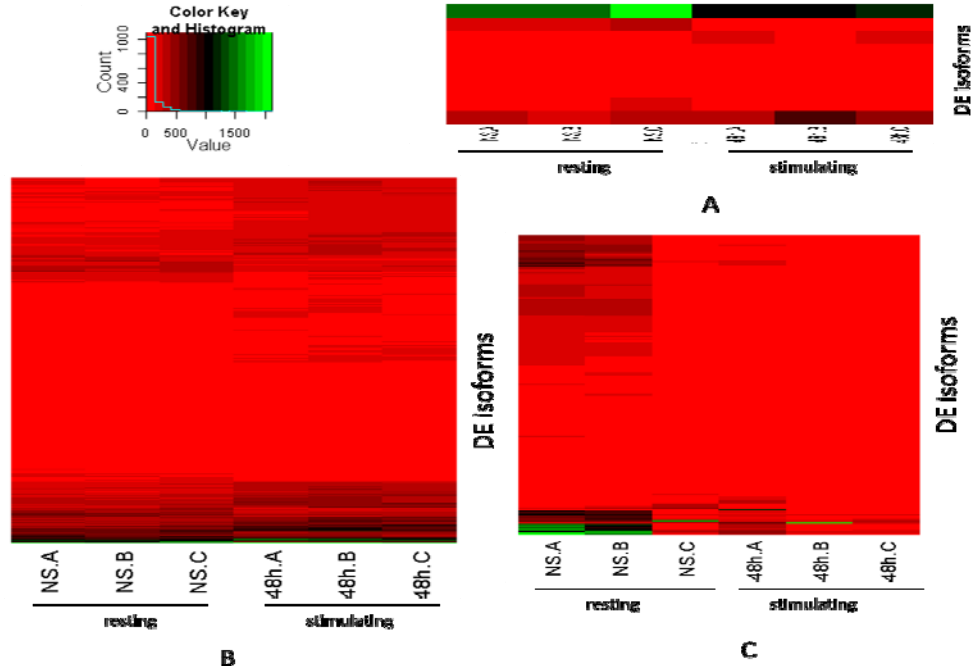

741

742

743

744

745

Figure 3

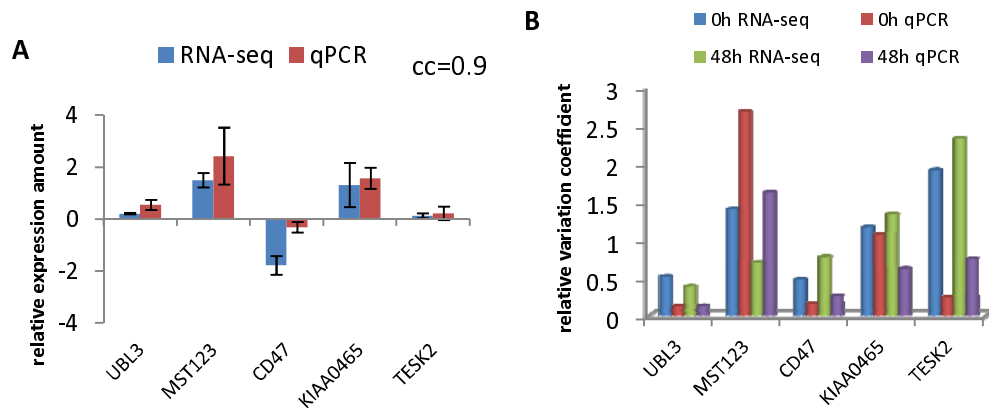

746

747

748

749

Figure 4

750

751

752

753

754

755

756

757

758

759

760

761

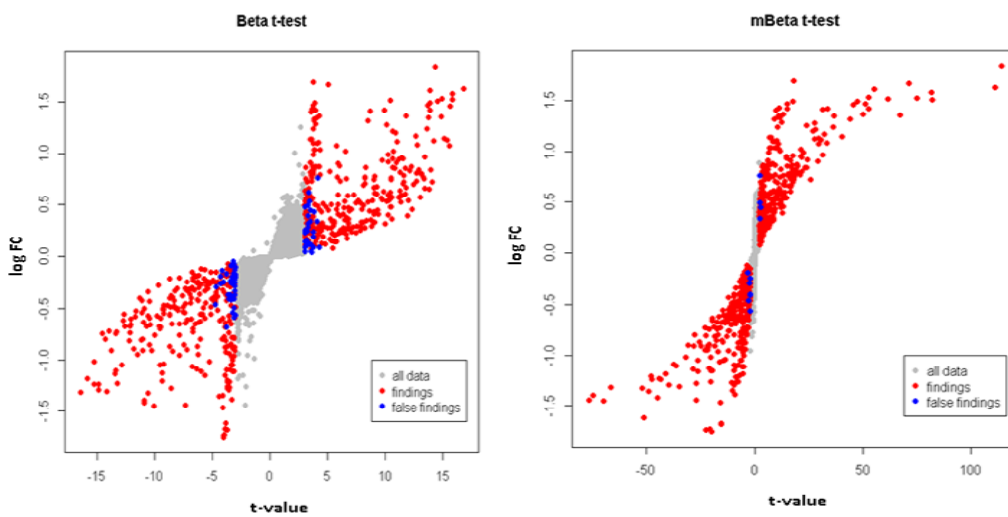

Figure 5

761

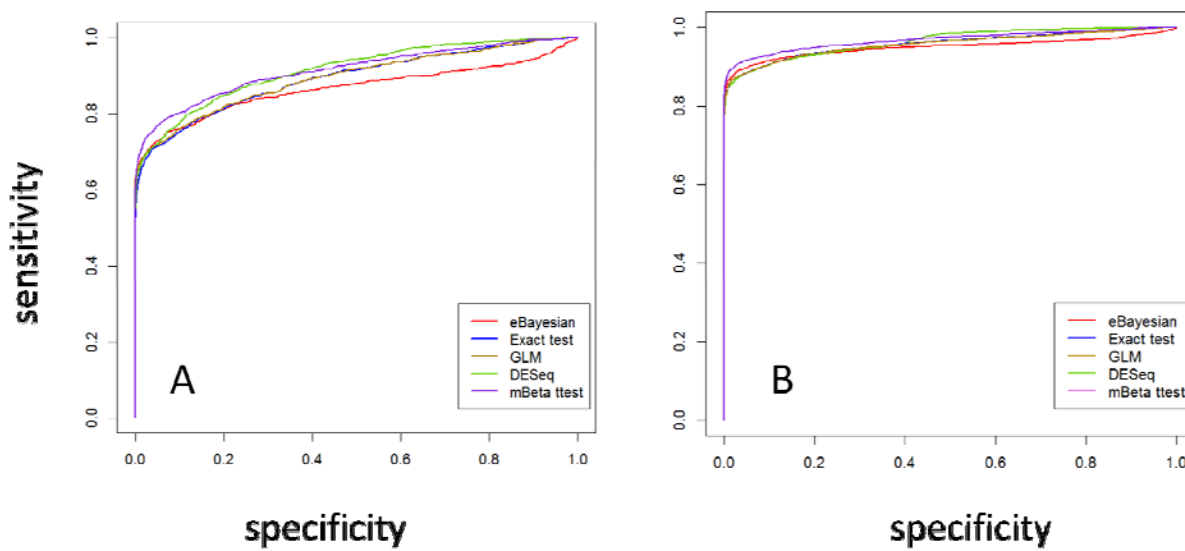

762

763

764

765

766

Figure 6

767 Table 1 Results of performing statistical methods on simulated data of 18162 isoforms and two  
 768 conditions in simulation scenarios 1 - 4 where simulations were based on real transcriptomic data

| scenario   | Statistical Method | numbers of findings |        | estimated FDR | true FDR    |          |
|------------|--------------------|---------------------|--------|---------------|-------------|----------|
|            |                    | mean                | stdev  |               | mean        | stdev    |
| Scenario 1 | eBayesian          | 684.3               | 20.74  | 0.049901661   | 0.023415632 | 0.005316 |
|            | Exact test         | 740.3               | 34.70  | 0.049290389   | 0.086608166 | 0.009598 |
|            | GLM                | 753.3               | 36.55  | 0.049609439   | 0.096184239 | 0.009912 |
|            | DESeq              | 552.0               | 24.24  | 0.049794642   | 0.007797678 | 0.002519 |
|            | beta t-test        | 800.7               | 4.93   | 0.049847667   | 0.144082436 | 0.010284 |
|            | mBeta t-test       | 726.0               | 3.46   | 0.048788614   | 0.037659939 | 0.008904 |
| Scenario 2 | eBayesian          | 990.7               | 17.61  | 0.04970673    | 0.06424989  | 0.004605 |
|            | Exact test         | 1003.0              | 28.68  | 0.04971551    | 0.089023333 | 0.002429 |
|            | GLM                | 1015.3              | 31.34  | 0.049347345   | 0.097436683 | 0.0047   |
|            | DESeq              | 855.0               | 14.42  | 0.048391895   | 0.011703212 | 0.005338 |
|            | beta t-test        | 1000.0              | 25.23  | 0.049856733   | 0.155683147 | 0.008473 |
|            | mBeta t-test       | 957.3               | 12.50  | 0.048912878   | 0.035496106 | 0.007327 |
| Scenario 3 | eBayesian          | 2271.3              | 49.52  | 0.049921947   | 0.027993743 | 0.002909 |
|            | Exact test         | 2299.3              | 36.69  | 0.049936596   | 0.053499728 | 0.002031 |
|            | GLM                | 2316.7              | 35.21  | 0.049880522   | 0.058151276 | 0.003686 |
|            | DESeq              | 1815.7              | 32.02  | 0.049790935   | 0.006585122 | 0.00228  |
|            | beta t-test        | 2323.0              | 46.11  | 0.049676633   | 0.071477617 | 0.009545 |
|            | mBeta t-test       | 2093.0              | 32.90  | 0.049291886   | 0.012110596 | 0.002648 |
| Scenario 4 | eBayesian          | 3024.0              | 166.91 | 0.04991893    | 0.070821217 | 0.01752  |
|            | Exact test         | 2880.3              | 145.08 | 0.049928763   | 0.044367555 | 0.008163 |
|            | GLM                | 2896.0              | 150.06 | 0.049981628   | 0.048324792 | 0.009311 |
|            | DESeq              | 2517.7              | 177.80 | 0.049904472   | 0.005894893 | 0.001385 |
|            | beta t-test        | 2913.0              | 40.92  | 0.049404633   | 0.073357708 | 0.007807 |
|            | mBeta t-test       | 2789.0              | 41.76  | 0.049425529   | 0.008624077 | 0.002894 |

769 Scenario 1: P(proportion of DE isoforms)=10%, Q(artificial noise proportion)=10%, A(condition effect)  
 770 =100, R(replicate number)=3; Scenario 2: P=10%, Q=10%, A=300, R=3; Scenario 3: P=30%, Q=10%,  
 771 A=100, R=3; Scenario 4: P=30%, Q=10%, A=300, R=3.  $\omega = 1$  for mBeta t-test method in scenarios 1-4. FDR  
 772 underestimated was marked by red color.

773  
 774  
 775  
 776  
 777  
 778

779 Table 2 Results of performing statistical methods on simulated data of 18162 isoforms and two  
 780 conditions in scenarios 5 - 8 where simulations were based on real transcriptomic data

| scenario   | Statistical methods | number of findings |        | estimated FDR | true FDR |          |
|------------|---------------------|--------------------|--------|---------------|----------|----------|
|            |                     | mean               | stdev  |               | mean     | stdev    |
| Scenario 5 | eBayesian           | 536.0              | 19.31  | 0.049475743   | 0.014225 | 0.004023 |
|            | Exact test          | 582.7              | 40.15  | 0.049037986   | 0.053917 | 0.022639 |
|            | GLM                 | 592.0              | 41.90  | 0.049785069   | 0.062515 | 0.024089 |
|            | DESeq               | 400.7              | 8.32   | 0.049205147   | 0.004114 | 0.003743 |
|            | Beta t-test         | 586.7              | 20.42  | 0.049744667   | 0.165699 | 0.010472 |
|            | mBeta t-test        | 608.3              | 37.87  | 0.049095016   | 0.045627 | 0.02317  |
| Scenario 6 | eBayesian           | 887.3              | 28.91  | 0.049840282   | 0.034131 | 0.002471 |
|            | Exact test          | 901.0              | 12.76  | 0.049361917   | 0.048886 | 0.005728 |
|            | GLM                 | 911.0              | 13.11  | 0.049262212   | 0.054955 | 0.007382 |
|            | DESeq               | 746.3              | 19.08  | 0.047905044   | 0.006171 | 0.005225 |
|            | Beta t-test         | 892.0              | 38.22  | 0.0495794     | 0.13778  | 0.017347 |
|            | mBeta t-test        | 864.3              | 27.06  | 0.04986485    | 0.027286 | 0.005041 |
| Scenario 7 | eBayesian           | 1880.0             | 37.98  | 0.049924036   | 0.016844 | 0.000593 |
|            | Exact test          | 1905.0             | 63.26  | 0.049760675   | 0.033698 | 0.003521 |
|            | GLM                 | 1936.3             | 67.33  | 0.04987274    | 0.039498 | 0.004252 |
|            | DESeq               | 1398.0             | 39.39  | 0.049872216   | 0.004724 | 0.002398 |
|            | Beta t-test         | 1800.7             | 151.30 | 0.0498517     | 0.070921 | 0.011422 |
|            | mBeta t-test        | 1887.3             | 74.19  | 0.049352367   | 0.018178 | 0.00276  |
| Scenario 8 | ebayesian           | 2780.3             | 71.62  | 0.049903333   | 0.049308 | 0.00472  |
|            | Exact               | 2653.3             | 97.38  | 0.04993212    | 0.033475 | 0.008219 |
|            | GLM                 | 2668.3             | 98.19  | 0.049910444   | 0.036769 | 0.008319 |
|            | DESeq               | 2275.3             | 81.32  | 0.049506184   | 0.004339 | 0.002514 |
|            | Beta t-test         | 2509.7             | 40.82  | 0.0498865     | 0.060843 | 0.010993 |
|            | mBeta t test        | 2599.7             | 29.73  | 0.049559249   | 0.014071 | 0.004408 |

781 Scenario 5: P=10%, Q=30%, A=100, R=3; Scenario 6: P=10%, Q=30%, A=300, R=3; Scenario 7: P=30%,  
 782 Q=30%, A=100, R=3; Scenario 8: P=30%, Q=30%, A=300, R=3.  $\omega = 1$  for mBeta t-test method in scenarios  
 783 5-8. FDR underestimated was marked by red color.

784

785

786

787

788

789

790 Table 3 Results of performing statistical methods on simulated data of 18162 isoforms and two  
 791 conditions in scenarios 9-12 where simulations were based on real isoform transcriptomic data

| scenario    | Statistical method | number of findings |        | estimated FDR | true FDR |          |
|-------------|--------------------|--------------------|--------|---------------|----------|----------|
|             |                    | mean               | stdev  |               | mean     | stdev    |
| Scenario 9  | eBayesian          | 1466.7             | 136.99 | 0.049816998   | 0.065909 | 0.017935 |
|             | Exact test         | 1455.7             | 135.50 | 0.04942623    | 0.075021 | 0.023157 |
|             | GLM                | 1492.0             | 157.43 | 0.049120039   | 0.092843 | 0.032046 |
|             | DESeq              | 1270.7             | 116.81 | 0.04968407    | 0.016749 | 0.004976 |
|             | Beta t-test        | 1447.7             | 103.58 | 0.049672      | 0.116815 | 0.028366 |
|             | mBeta t-test       | 1457.3             | 114.02 | 0.048886388   | 0.03596  | 0.009967 |
| Scenario 10 | eBayesian          | 1822.3             | 95.61  | 0.049864672   | 0.104564 | 0.013078 |
|             | Exact test         | 1768.3             | 117.50 | 0.049594284   | 0.08398  | 0.028075 |
|             | GLM                | 1794.7             | 131.76 | 0.049606781   | 0.094059 | 0.033016 |
|             | DESeq              | 1593.3             | 125.52 | 0.049260009   | 0.021667 | 0.012233 |
|             | Beta t-test        | 1772.0             | 67.55  | 0.049848      | 0.132159 | 0.025635 |
|             | mBeta t-test       | 1697.667           | 67.26  | 0.049301841   | 0.032401 | 0.007489 |
| Scenario 11 | eBayesian          | 4894.7             | 289.89 | 0.049930905   | 0.081428 | 0.011789 |
|             | Exact test         | 4633.3             | 303.32 | 0.049761768   | 0.051046 | 0.013995 |
|             | GLM                | 4681.3             | 332.24 | 0.049960589   | 0.057404 | 0.018121 |
|             | DESeq              | 4206.3             | 317.16 | 0.049814792   | 0.013886 | 0.005984 |
|             | Beta t-test        | 4700.7             | 362.29 | 0.0493765     | 0.070815 | 0.014574 |
|             | mBeta t-test       | 4438.3             | 149.79 | 0.04952921    | 0.0124   | 0.000406 |
| Scenario 12 | ebayesian          | 5701.0             | 206.72 | 0.049939398   | 0.099753 | 0.01504  |
|             | Exact test         | 5453.7             | 100.48 | 0.049737062   | 0.048492 | 0.006854 |
|             | GLM                | 5454.7             | 145.40 | 0.049840291   | 0.053679 | 0.008784 |
|             | DESeq              | 4915.3             | 228.00 | 0.049430541   | 0.012464 | 0.005037 |
|             | Beta t-test        | 5091.7             | 128.48 | 0.049957167   | 0.066915 | 0.013236 |
|             | mBeta t-test       | 5072.3             | 135.57 | 0.049633984   | 0.01087  | 0.002098 |

792 Scenario 9: P=10%, Q=10%, A=100, R=5; Scenario 10: P=10%, Q=10%, A=300, R=5; Scenario 11: P=30%,  
 793 Q=10%, A=100, R=5; Scenario 4: P=30%, Q=10%, A=300, R=5.  $\omega = 0.45$  for the mBeta t-test method in  
 794 scenarios 9-12. FDR underestimated was marked by red color.

795

796

797

798

799

800

801

802

803

Table 4 Stability analysis of methods

| Standard deviation of findings |                      | Standard deviation of true FDR |                      |
|--------------------------------|----------------------|--------------------------------|----------------------|
| method                         | Averaged order score | method                         | Averaged order score |
| mBeta t-test                   | 2.333333             | DESeq                          | 1.833333             |
| Exact test                     | 3.166667             | mBeta t-test                   | 2.5                  |
| Beta t-test                    | 3.25                 | eBayesian                      | 3                    |
| eBayesian                      | 3.416667             | Exact test                     | 3.5                  |
| DESeq                          | 3.833333             | Beta t-test                    | 5.083333             |
| GLM                            | 5                    | GLM                            | 5.083333             |

804

805

806

807

808

809

810

811

812

813

814

815

816

817

818

819

820

821

Table 5 Averaged work efficiencies of statistical methods

| Scenario factors                    | eBayesian |         | Exact test |         | GLM     |         | DESeq   |         | Beta t-test |       | mBeta t-test |         |
|-------------------------------------|-----------|---------|------------|---------|---------|---------|---------|---------|-------------|-------|--------------|---------|
|                                     | mean      | stdev   | mean       | stdev   | mean    | stdev   | mean    | stdev   | mean        | stdev | mean         | stdev   |
| 3 replicate libraries               | 0.48697   | 0.321   | 0.3726     | 0.40689 | 0.27557 | 0.3884  | 0.57566 | 0.15142 | 0           | 0     | 0.69207      | 0.12025 |
| 5 replicate libraries               | 0         | 0       | 0.46259    | 0.53764 | 0       | 0       | 0.81272 | 0.15142 | 0           | 0     | 0.87067      | 0.07198 |
| proportion of DE genes/isoforms=10% | 0.30974   | 0.35327 | 0.13241    | 0.32434 | 0       | 0       | 0.63812 | 0.09414 | 0           | 0     | 0.75333      | 0.14388 |
| proportion of DE genes/isoforms=30% | 0.3281    | 0.36791 | 0.49808    | 0.42951 | 0.16917 | 0.31848 | 0.66774 | 0.18908 | 0           | 0     | 0.7625       | 0.14959 |
| artificial effect proportion =10%   | 0.31775   | 0.36784 | 0.21165    | 0.42329 | 0.2128  | 0.42559 | 0.62857 | 0.19842 | 0           | 0     | 0.7298       | 0.1188  |
| artificial effect proportion =30%   | 0.3281    | 0.36791 | 0.49808    | 0.42951 | 0.16917 | 0.31848 | 0.66774 | 0.13814 | 0           | 0     | 0.7625       | 0.14959 |
| condition effect =100               | 0.3827    | 0.30323 | 0.23505    | 0.37554 | 0.09485 | 0.23234 | 0.5427  | 0.19842 | 0           | 0     | 0.66057      | 0.12078 |
| condition effect =300               | 0.2666    | 0.41316 | 0.57015    | 0.44847 | 0.27258 | 0.4228  | 0.76666 | 0.1635  | 0           | 0     | 0.84263      | 0.07676 |



Table 6. Results of performances of 3 statistical methods on two real gene transcriptomic data

| data type          |                        | Exact test | mBeta t-test <sup>a</sup> | Beta t-test |
|--------------------|------------------------|------------|---------------------------|-------------|
| Gene count data    | # of DE genes found    | 799        | 1774                      | 2515        |
|                    | estimated FDR          | 0.0499     | 0.0499                    | 0.0489      |
|                    | least true FDR         | 0.2753     | 0.0056                    | 0.3062      |
| Isoform count data | # of DE isoforms found | 1029       | 1981                      | 3025        |
|                    | estimated FDR          | 0.0499     | 0.0498                    | 0.0499      |
|                    | least true FDR         | 0.2799     | 0.0101                    | 0.3530      |

a:  $\omega = 1$
